# Supplementary material for: Hydromorphological restoration stimulates river ecosystem metabolism
Source: Copernicus journal article supplement (doi:10.5194/bg-14-1989-2017), 2017-04-12
Supplement: Supplementary file 1 [file Data to be deposited in repository.xlsx]

## Sheet: data metabolism
Day	GPP1	GPP2	GPP3	GPP4	ER1	ER2	ER3	ER4	NEP1	NEP2	NEP3	NEP4	PR1	PR2	PR3	PR4	T1 (°C)	T2 (°C)	T3 (°C)	Q (m³/s)
d1	4.28651	4.97222	8.83583	11.2997	6.29358	6.24241	11.1811	9.54563	-2.00707	-1.27019	-2.34523	1.75406	0.681092	0.796522	0.79025	1.18376	13.9223	14.0412	14.1523	9.11292
d2	5.92642	6.5023	9.25249	11.8562	9.2587	8.04479	11.3368	8.75647	-3.33228	-1.54249	-2.08435	3.09969	0.640092	0.808262	0.816144	1.35399	13.8672	13.9836	14.0795	8.48559
d3	7.16744	6.94222	9.33876	10.6256	10.7472	8.41565	11.5084	9.58501	-3.57979	-1.47343	-2.16964	1.04055	0.666911	0.824918	0.811473	1.10856	14.2438	14.3565	14.4566	8.41726
d4	6.80092	8.08413	10.1168	12.0353	9.30265	8.68109	11.3573	8.66303	-2.50173	-0.596958	-1.24043	3.37229	0.731073	0.931235	0.890781	1.38927	14.4222	14.5106	14.5848	8.73195
d5	7.4272	6.5626	9.5486	12.9355	10.201	8.3628	12.9939	12.2649	-2.77378	-1.8002	-3.44533	0.67061	0.728087	0.784738	0.734851	1.05468	13.9616	14.0852	14.1958	8.81567
d9	8.698	8.2503	9.73049	11.9577	9.82828	9.40627	12.4574	10.5953	-1.13028	-1.15597	-2.72687	1.36234	0.884997	0.877106	0.781103	1.12858	14.1764	14.2658	14.378	8.56881
d10	5.77433	6.30286	10.1835	13.9273	9.515	9.67496	17.4162	17.2539	-3.74067	-3.37209	-7.23269	-3.32659	0.606866	0.651462	0.584715	0.807198	14.0205	14.0721	14.1524	11.5999
d11	6.23091	7.12067	8.23472	11.1374	10.3447	11.4115	12.7991	12.9361	-4.11382	-4.29079	-4.56433	-1.79866	0.602327	0.623993	0.643385	0.860958	13.5192	13.626	13.7251	10.7515
d12	7.75096	9.67392	14.8101	18.2244	10.5666	11.9722	17.9159	15.572	-2.81562	-2.29829	-3.10589	2.65239	0.733536	0.808032	0.826641	1.17033	13.3065	13.4119	13.5337	9.91299
d13	11.5086	9.78574	13.4961	15.7351	13.8715	10.9877	17.2876	16.3029	-2.36292	-1.20192	-3.79157	-0.567799	0.829657	0.890612	0.780677	0.965172	14.0376	14.0971	14.1831	8.28957
d14	10.6626	12.3572	17.6346	18.5328	11.1303	12.1326	18.9434	16.5283	-0.467702	0.224568	-1.3088	2.00449	0.95798	1.01851	0.93091	1.12128	16.0446	16.0792	16.1887	6.78832
d17	13.0574	10.781	16.4706	15.4796	17.5203	14.021	24.7061	20.9439	-4.46289	-3.24004	-8.23552	-5.46437	0.745273	0.768916	0.666661	0.739095	18.2192	18.2559	18.4467	6.11246
d18	10.4899	9.77779	13.0567	14.3831	14.5403	13.7204	19.4461	15.0701	-4.05038	-3.94261	-6.38941	-0.68705	0.721437	0.712646	0.67143	0.95441	18.353	18.3659	18.5443	6.36103
d19	0	0	0	0	20.657	12.8575	26.7605	43.7177	-20.657	-12.8575	-26.7605	-43.7177	0	0	0	0	16.6442	16.7278	16.7875	12.5707
d20	0	0	0	0	15.2797	11.7085	23.4891	105.649	-15.2797	-11.7085	-23.4891	-105.649	0	0	0	0	13.9909	14.1574	14.1928	37.6367
d21	0	0	0	0	10.1063	6.34733	7.71009	17.629	-10.1063	-6.34733	-7.71009	-17.629	0	0	0	0	13.5655	13.7487	13.7917	46.6637
d22	0	0	0	0	11.2682	5.96708	7.20305	19.5601	-11.2682	-5.96708	-7.20305	-19.5601	0	0	0	0	14.0518	14.2236	14.2682	42.5528
d23	0	0	0	0	10.743	6.50766	8.71693	20.7906	-10.743	-6.50766	-8.71693	-20.7906	0	0	0	0	14.5615	14.7301	14.7881	32.6506
d24	0	0	0	0	10.0326	6.61534	8.63634	16.7991	-10.0326	-6.61534	-8.63634	-16.7991	0	0	0	0	14.4395	14.6356	14.7125	27.2779
d25	0	0	0	0	10.1071	7.27169	9.39892	25.3764	-10.1071	-7.27169	-9.39892	-25.3764	0	0	0	0	13.9597	14.1614	14.2234	23.6484
d26	0	0	0	0	11.0279	7.89578	9.85944	23.4605	-11.0279	-7.89578	-9.85944	-23.4605	0	0	0	0	14.2103	14.3573	14.3887	18.3155
d27	0	0	0	0	11.3941	8.37417	10.636	20.923	-11.3941	-8.37417	-10.636	-20.923	0	0	0	0	15.4458	15.5758	15.6355	15.4229
d28	0	0	0	0	7.76755	5.23907	6.39422	18.7376	-7.76755	-5.23907	-6.39422	-18.7376	0	0	0	0	17.7341	17.8882	17.9614	25.8985
d29	0	0	0	0	7.82269	4.44731	5.90752	8.60103	-7.82269	-4.44731	-5.90752	-8.60103	0	0	0	0	16.9697	17.1159	17.1825	22.9176
d30	3.43264	2.32232	3.99121	9.06222	8.04193	4.21079	5.91265	6.8485	-4.60929	-1.88847	-1.92144	2.21372	0.426843	0.551517	0.675029	1.32324	17.7438	17.8827	17.9712	16.7643
d31	4.669	3.02163	4.24327	8.73921	8.07977	4.19419	5.91861	7.84119	-3.41077	-1.17256	-1.67534	0.898019	0.577863	0.720432	0.716937	1.11453	17.7599	17.8961	17.9812	14.2326
d32	3.2715	2.68725	3.60888	6.61791	5.92056	4.03934	5.98146	8.53875	-2.64906	-1.35209	-2.37258	-1.92084	0.552566	0.66527	0.603344	0.775045	17.0661	17.2112	17.2742	13.192
d33	4.98778	3.8754	6.85237	11.0408	6.47141	4.45013	7.73408	9.25152	-1.48363	-0.574724	-0.881715	1.78931	0.77074	0.870852	0.885996	1.19341	17.0778	17.2392	17.3297	12.075
d34	3.79398	5.49561	7.07114	10.4222	4.95722	5.5524	8.00417	9.32659	-1.16324	-0.0567834	-0.933034	1.09561	0.765345	0.989773	0.883432	1.11747	17.7598	17.9077	18.0062	10.9309
d35	4.47696	4.19574	5.49846	8.69871	6.72531	6.05854	7.57151	10.6589	-2.24835	-1.8628	-2.07305	-1.96017	0.665688	0.692533	0.726204	0.8161	18.1267	18.2617	18.3554	10.625
d36	3.93059	4.89138	6.90873	12.125	7.3009	8.39607	11.0404	15.644	-3.37031	-3.50469	-4.13163	-3.51901	0.538371	0.58258	0.62577	0.775056	18.0206	18.1513	18.2238	14.3108
d37	0	0	0	0	6.35416	8.77387	11.2634	26.0141	-6.35416	-8.77387	-11.2634	-26.0141	0	0	0	0	17.5331	17.5699	17.6279	24.6264
d38	2.59652	3.89043	4.88329	10.8142	5.93086	6.26449	7.76376	14.6374	-3.33435	-2.37406	-2.88048	-3.82318	0.437798	0.621029	0.628984	0.738808	16.9202	16.9995	17.0778	21.6274
d39	3.06195	4.13874	4.5403	8.45793	6.02038	5.79793	6.298	11.0058	-2.95843	-1.65919	-1.7577	-2.54783	0.508597	0.71383	0.720911	0.7685	16.823	16.9318	17.0366	17.2489
d40	2.95579	5.30134	6.21262	10.2322	5.30919	7.00668	6.96071	7.8603	-2.3534	-1.70534	-0.748095	2.37188	0.55673	0.756612	0.892526	1.30175	17.1616	17.2371	17.3251	15.161
d41	2.5933	5.03628	5.55681	8.50057	5.48751	8.67091	6.52004	7.0739	-2.8942	-3.63463	-0.963226	1.42667	0.472583	0.580825	0.852267	1.20168	17.3349	17.426	17.5318	14.1149
d42	3.37333	5.14017	7.77729	11.264	5.01664	8.16078	8.26847	8.863	-1.64331	-3.0206	-0.491178	2.40104	0.672428	0.629863	0.940596	1.27091	17.3364	17.4097	17.4963	12.7637
d43	3.21664	4.77544	6.02155	10.6515	5.41096	8.16112	8.23034	12.6268	-2.19432	-3.38568	-2.20879	-1.97533	0.594467	0.585146	0.731628	0.843561	17.3959	17.4646	17.5508	13.9469
d44	5.70894	5.70699	8.81459	13.1781	7.22587	7.76322	8.68264	9.77358	-1.51693	-2.05623	0.131954	3.40457	0.79007	0.735132	1.0152	1.34834	17.128	17.217	17.3157	11.2671
d45	4.73993	5.53044	7.43694	11.2455	7.09057	6.25445	8.46461	10.9428	-2.35064	-0.724015	-1.02767	0.30267	0.668484	0.88424	0.878592	1.02766	17.4262	17.5024	17.6064	10.5701
d46	5.85525	6.92951	10.603	13.6885	7.73896	7.27195	10.4623	10.6419	-1.88371	-0.342439	0.140707	3.0466	0.756594	0.95291	1.01345	1.28628	17.4108	17.4987	17.604	10.1128
d47	5.33965	6.93194	9.14656	n.a.	8.13004	7.60949	9.38554	n.a.	-2.79039	-0.67755	-0.238974	n.a.	0.65678	0.91096	0.974538	n.a.	17.7945	17.8732	17.9849	10.484
d48	4.87055	8.0171	8.43938	n.a.	7.67654	9.64568	9.43351	n.a.	-2.80599	-1.62857	-0.994133	n.a.	0.634472	0.83116	0.894617	n.a.	17.6532	17.6861	17.7497	9.48202
d49	5.92931	7.39178	8.49055	n.a.	9.36518	9.21688	9.96375	n.a.	-3.43587	-1.82511	-1.47321	n.a.	0.633123	0.801982	0.852144	n.a.	17.0799	17.1476	17.2039	11.5659
*Estimated at the end of the river sections D = 1, R1 = 2, R2 = 3, and for the combined restored reaches R1+R2 = 4. Data recorded at the time of flooding events were omitted from analyses, because metabolic rates were not representative (e.g. no detectable GPP); these days are written in italics. Metabolism measurements from days at which floating macrophytes accumulated around probes and affecte…
