# Supplementary material for: Hydromorphological restoration stimulates river ecosystem metabolism
Source: Copernicus journal article supplement (doi:10.5194/bg-14-1989-2017), 2017-04-12
Supplement: Supplementary file [file bg-14-1989-2017-supplement-title-page.pdf › bg-14-1989-2017-supplement-title-page.pdf]

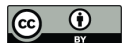

## *Supplement of*

# **Hydromorphological restoration stimulates river ecosystem metabolism**

**Benjamin Kupilas et al.**

*Correspondence to:* Benjamin Kupilas ([benjamin.kupilas@uni-due.de](mailto:benjamin.kupilas@uni-due.de))

- [bg-14-1989-2017-supplement-title-page.pdf](#)
- [Data to be deposited in repository.xlsx](#)
- [Supplement.pdf](#)

The copyright of individual parts of the supplement might differ from the CC-BY 3.0 licence.
